# Supplementary material for: Conversion of cellulose to lactic acid catalyzed by erbium-exchanged montmorillonite K10
Source: Royal Society of Chemistry journal article supplement (doi:10.1039/c4gc02131b), 2015-01-01
Supplement: c4gc02131b1.pdf [file c4gc02131b1.pdf]

## Supporting Information

# **Conversion of cellulose to lactic acid catalyzed by erbium-exchanged montmorillonite K10**

Fen-Fen Wang, Jie Liu, Hao Li, Chun-Ling Liu, Rong-Zhen Yang, Wen-Sheng Dong\*

*Key Laboratory of Applied Surface and Colloid Chemistry (SNNU), MOE, School of Chemistry and  
Chemical Engineering, Shaanxi Normal University, Xi'an, 710062, China*

\* To whom correspondence should be addressed. E-mail: [wsdong@snnu.edu.cn](mailto:wsdong@snnu.edu.cn)

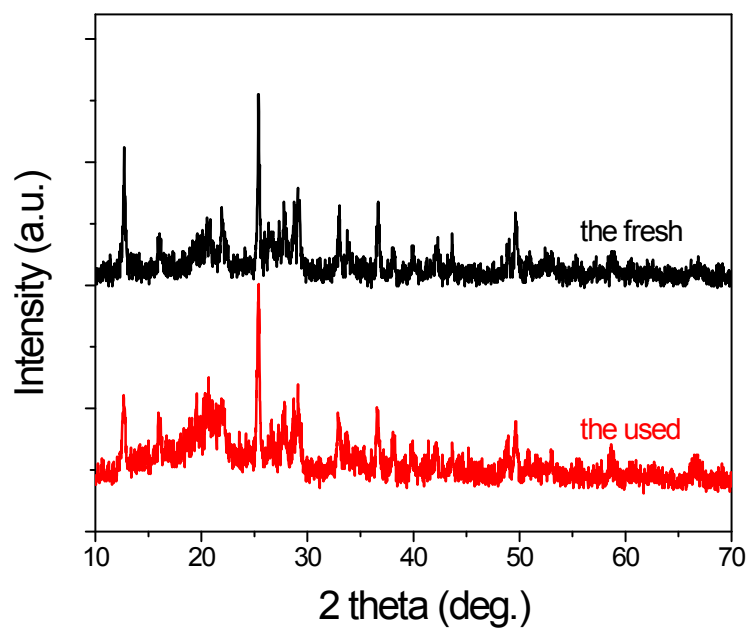

**Figure s1.** X-ray diffraction patterns of Er/K10(S)-3 before and after use.

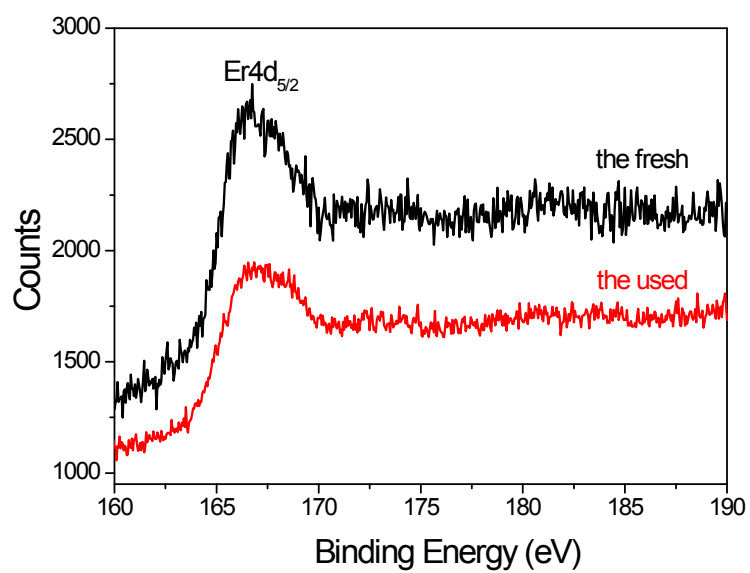

**Figure s2.** Er 4d XPS profiles of Er/K10(S)-3 before and after use.

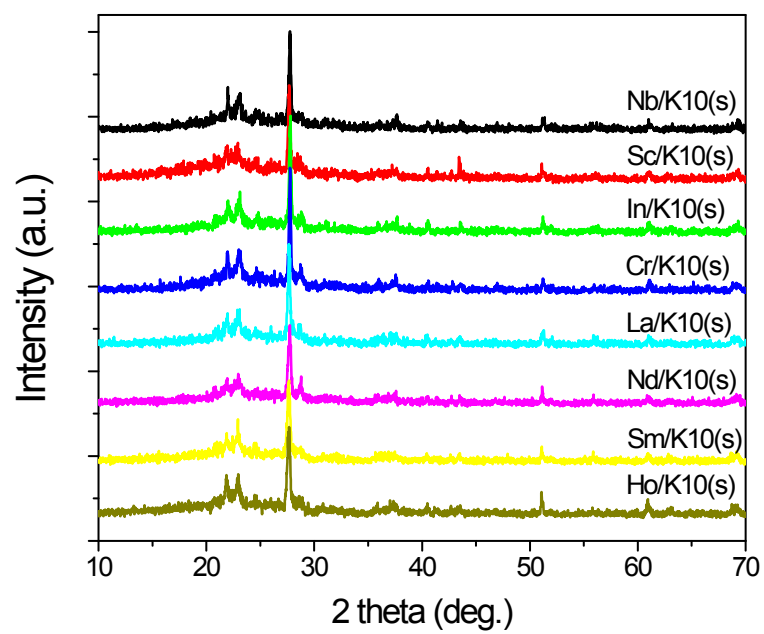

**Figure s3.** X-ray diffraction patterns of various catalysts.
